1 **Electrochemical carbon fiber-based technique for simultaneous**  
2 **recordings of brain tissue PO<sub>2</sub>, pH, and extracellular field potentials**

3

4 Patrick S. Hosford<sup>1,2\*</sup>, Jack A. Wells<sup>3</sup>, Isabel N. Christie<sup>1</sup>, Mark Lythgoe<sup>3</sup>, Julian  
5 Millar<sup>4</sup> and Alexander V. Gourine<sup>1</sup>

6

7 <sup>1</sup>*Centre for Cardiovascular and Metabolic Neuroscience, Neuroscience, Physiology*  
8 *& Pharmacology, University College London, London, UK*

9 <sup>3</sup>*Centre for Advanced Biomedical Imaging, Department of Medicine, University*  
10 *College London, London, UK*

11 <sup>2</sup>*William Harvey Research Institute, Barts and the London School of Medicine and*  
12 *Dentistry, London, UK*

13 <sup>4</sup>*Department of Medical Education, Barts and the London School of Medicine and*  
14 *Dentistry, London, UK*

15

16 \*Corresponding author: PSH;

17 Email: [p.hosford@ucl.ac.uk](mailto:p.hosford@ucl.ac.uk)

18 Telephone: +440203182410

19 Address: Department of Neuroscience, Physiology & Pharmacology, University  
20 College London, Gower Street, London, UK, WC1E 6BT.

21

22 **Abstract**

23

24 A method for simultaneous electrochemical detection of brain tissue PO<sub>2</sub> (P<sub>t</sub>O<sub>2</sub>)  
25 and pH changes together with neuronal activity using a modified form of fast  
26 cyclic voltammetry with carbon fiber electrodes is described. This technique has  
27 been developed for *in vivo* applications and recordings from discrete brain nuclei  
28 in experimental animals. The small size of the carbon fiber electrode (∅7µm,  
29 length <100µm) ensures minimal disruption of the brain tissue and allows  
30 recordings from small brain areas. Sample rate (up to 4 Hz) is sufficient to  
31 resolve rapid changes in P<sub>t</sub>O<sub>2</sub> and pH that follow changes in neuronal activity and  
32 metabolism. Rapid switching between current and voltage recordings allows  
33 combined electrochemical detection and monitoring of extracellular action  
34 potentials. For simultaneous electrochemical detection of P<sub>t</sub>O<sub>2</sub> and pH, two  
35 consecutive trapezoidal voltage ramps are applied with double differential-

1 subtraction of the background current. This enables changes in current caused  
2 by protons and oxygen to be detected separately with minimal interference  
3 between the two. The profile of  $P_tO_2$  changes evoked by increases in local  
4 neuronal activity recorded using the described technique was similar to that of  
5 blood oxygen level dependent responses recorded using fMRI. This voltammetric  
6 technique can be combined with fMRI and brain vessel imaging to study the  
7 metabolic mechanisms underlying neurovascular coupling response with much  
8 greater spatial and temporal resolution than is currently possible.

9

## 10 **Keywords**

11

12 Fast Cyclic voltammetry, carbon fiber electrode, tissue  $PO_2$ , pH, *in vivo*,  
13 extracellular potential, neurovascular coupling

14

## 15 **Introduction**

16

17 The method described here has been developed to study the mechanisms  
18 underlying the neurovascular coupling response (Hosford and Gourine 2018).  
19 The mechanisms of neurovascular coupling contribute to accurate matching of  
20 brain oxygen and glucose supply with demand. Sustained disruption of this  
21 balance has been postulated to contribute to cognitive impairment and the  
22 development of neurodegenerative disease (Iadecola 2017). Understanding the  
23 cellular and molecular mechanisms of neurovascular coupling could be important  
24 for the development of future treatments for these conditions. Yet, despite  
25 intense experimental scrutiny over the last two decades, the mechanisms  
26 underlying neurovascular coupling are not fully understood and are surrounded  
27 by controversies (Hosford and Gourine 2018).

28

29 The 'feed-forward' hypothesis of neurovascular coupling (Attwell et al. 2010)  
30 suggests that neurotransmitters released during neuronal activity signal to  
31 astrocytes and pericytes to induce dilation of the cerebral vasculature (Mishra et  
32 al. 2016). However, astrocytes are also sensitive to changes in partial pressure  
33 of oxygen ( $PO_2$ ) (Angelova et al. 2015) as well as  $CO_2$  and protons ( $H^+$ ) (Gourine  
34 et al. 2010; Howarth et al. 2017; Karagiannis et al. 2016). Changes in brain  
35 tissue  $PO_2$ ,  $PCO_2$  and pH correlate with changes in neuronal activity and could

1 contribute to neurovascular coupling via a metabolic feed-back mechanism, as  
2 was originally proposed by Roy and Sherrington (Roy and Sherrington 1890).

3

4 Blood oxygen level dependent functional magnetic resonance imaging (BOLD-  
5 fMRI) (Buxton and Frank 1997) and 2-photon excitation brain vessel imaging  
6 (Takano et al. 2006) have been widely used to study the mechanisms of the  
7 neurovascular response. However, these techniques have significant limitations.  
8 fMRI is non-invasive but suffers from relatively poor spatial and temporal  
9 resolution. This is particularly problematic in studies of the brain using small  
10 rodent models. Moreover, the BOLD fMRI signal represents a composite  
11 response determined by changes in blood flow, blood volume and oxygen  
12 consumption, and as such lacks specificity to the underlying haemodynamic  
13 mechanisms that give rise to functional hyperaemia. Direct and simultaneous  
14 recordings of neuronal activity, although notably achieved during fMRI in non-  
15 human primates by Logothetis and co-workers (Logothetis et al. 2001), are not  
16 routine. Optical brain imaging is usually confined to cortical structures with  
17 imaging depth limited by the light scattering properties of the tissue (Helmchen  
18 and Denk 2005). Additionally, to achieve simultaneous recordings of the vessel  
19 diameter and neuronal activity one must introduce calcium, voltage sensitive  
20 and/or cell specific dyes or genetically encoded sensors of activity. These come  
21 with their own caveats; for example there is evidence that commonly used  
22 calcium sensors also buffer intracellular calcium and may impair normal cellular  
23 function (Bootman et al. 2018). To overcome some of these issues we aimed to  
24 develop a minimally invasive technique for *in vivo* recordings of neuronal activity  
25 and associated metabolic changes with high spatial and temporal resolution.

26

27 Fast-cyclic voltammetry (FCV) using carbon fiber microelectrodes (CFM) is an  
28 established technique used to determine the dynamics of neurotransmitter  
29 release and reuptake *in vitro* and *in vivo* (Rodeberg et al. 2017). FCV relies on  
30 rapidly changing the potential of the CFM vs an Ag/AgCl<sub>2</sub> reference electrode  
31 several times a second over a narrow voltage range to oxidise or reduce the  
32 analyte of interest. The amplitude of the current flux between the CFM and the  
33 analyte is recorded and used to determine the analyte concentration. Specific  
34 advantages of this technique include the small electrode size making it ideal for  
35 studies of localised metabolic changes in small brain areas. There is minimal

1 damage to the microcirculation within the tissue and the measurements can be  
2 confined to localised brain regions located at any depth. The sub-second time  
3 resolution of FCV allows detection of events that occur at the onset of neuronal  
4 activity and precede increases in blood flow (Logothetis et al. 2001). Separate  
5 electrochemical detection of tissue partial pressure of oxygen ( $PtO_2$ ) and pH  
6 using FCV has been achieved previously (Bucher et al. 2014; Hosford et al.  
7 2017; Takmakov et al. 2010). Here we describe a novel FCV-based technique  
8 that enables simultaneous recordings of key variables representing the  
9 metabolic state of the brain: brain tissue  $PO_2$ , pH and neuronal activity.

10

11

## 12 **Materials and Methods**

13

### 14 *Carbon fiber microelectrodes*

15

16 CFMs (diameter 7  $\mu\text{m}$ ) were made as described in detail previously (Hosford et  
17 al. 2015; Millar and Pelling 2001). Briefly, single carbon fiber monofilaments  
18 (Goodfellow Metals) of  $\sim 10\text{cm}$  in length were inserted into borosilicate glass  
19 tubing (1.5 mm O.D, Harvard Bioscience) pre-filled with acetone. After complete  
20 evaporation of the solvent, the glass tubing was transferred to a conventional  
21 horizontal micropipette puller (Model 97, Sutter Instruments) and heated to  
22 taper the glass under medium-fast pull speed. The carbon fiber bridging the two  
23 pulled electrodes was then cut and connected to a copper wire using a low-  
24 melting point tin-bismuth alloy. The carbon fiber tip was trimmed to  $\sim 80\ \mu\text{m}$  in  
25 length by applying a high DC voltage source ( $\sim 400\ \text{V}$ ) guided using a standard  
26 laboratory microscope.

27

### 28 *Electrode Calibration*

29

30 All the recordings were performed using the equipment detailed in [Figure 1A](#).  
31 CFMs oxygen sensitivity calibration was performed in phosphate-buffered saline  
32 (PBS) containing (in mM) 137 NaCl, 2.7 KCl and 10 phosphate buffer (pH 7.4,  
33 unless otherwise stated) saturated with nitrogen to displace the dissolved  
34 oxygen.  $PO_2$  of the solution was then increased stepwise by additions of PBS  
35 saturated with 100% oxygen and monitored using an optical oxygen sensor

1 (Oxylite™; Oxford Optronix), adjusted for temperature. A calibration curve of  
2 electrode faradaic current changes vs PO<sub>2</sub> over a range of 5-75 mmHg was  
3 constructed.

4  
5 pH calibration was performed in PBS adjusted to the desired pH using additions  
6 of HCL or NaOH and monitored using a standard pH meter. Electrodes were  
7 calibrated in a small volume (3 ml) bath that allowed rapid fluid exchange. From  
8 a starting point of pH 7.4, buffer pH was changed stepwise to either 7.6, 7.2 or  
9 7.0 in a random order for a particular electrode. A calibration curve of electrode  
10 current changes over a pH range of 7.0-7.6 was constructed.

11  
12

### 13 *Ethical approval and animal husbandry*

14

15 All animal experiments were performed in accordance with the European  
16 Commission Directive 2010/63/EU (European Convention for the Protection of  
17 Vertebrate Animals used for Experimental and Other Scientific Purposes) and the  
18 UK Home Office (Scientific Procedures) Act (1986) with project approval from  
19 the University College London Institutional Animal Care and Use Committee. The  
20 rats were obtained from Charles River UK and housed in a temperature-  
21 controlled room on a 12 h light/dark cycle. Animals had access to standard  
22 laboratory chow and water *ad libitum*. On completion of the experiments, the  
23 animals were humanely killed by an anaesthetic overdose (pentobarbital sodium,  
24 60 mg kg<sup>-1</sup>, i.v.).

25

### 26 *Animal preparation*

27

28 Adult male Sprague-Dawley rats (280-320g) were prepared for the experiments  
29 in accord with the previously established imaging protocols (Wells et al. 2015).  
30 Anaesthesia was induced by isoflurane (2.5-4.0% in oxygen-enriched air) to  
31 establish vascular access by femoral vein cannulation. Anaesthesia was then  
32 transitioned to  $\alpha$ -chloralose (75 mg kg<sup>-1</sup>, i.v. initial dose followed by  
33 supplementary doses of 10–20 mg kg<sup>-1</sup>, i.v., as required). The right femoral  
34 artery was cannulated to monitor the arterial blood pressure. The trachea was  
35 cannulated and the animal was mechanically ventilated ( $\sim$ 60 strokes min<sup>-1</sup>;

1 stroke volume - 8 ml kg<sup>-1</sup>) with oxygen-enriched room air using a positive  
2 pressure ventilator (Harvard Apparatus) or an MR-compatible small animal  
3 ventilator (CWE).

4

5 Arterial PO<sub>2</sub>, PCO<sub>2</sub> and pH were recorded at regular intervals using a pH/blood  
6 gas analyser (Siemens) and maintained within the physiological ranges (PO<sub>2</sub>  
7 100–120 mmHg, CO<sub>2</sub> 35–40 mmHg and pH at 7.35–7.45) by adjusting the  
8 frequency and/or volume of mechanical ventilation. Body temperature was  
9 maintained at 37.0±0.5°C

10

### 11 *Fast scan cyclic voltammetry*

12

13 After exposure of the skull surface by midline incision, access to the  
14 somatosensory cortex was established via a small craniotomy (~1 mm<sup>2</sup>) The  
15 dura was pierced and reflected laterally to prevent damage to the microelectrode  
16 tip. Under the microscopic guidance and control of a micromanipulator, CFM was  
17 inserted into the somatosensory forelimb region of the cortex (S1FL;  
18 coordinates: 2.8-3.8 mm lateral, 1.3-1.5 caudal and 0.1-0.5 mm ventral from  
19 Bregma).

20

21 The CFM was slowly advanced and placed into the S1FL when clear evoked  
22 action potentials were recorded in response to the electrical stimulation (1 Hz) of  
23 the contralateral paw. The trapezoidal voltage ramps (Figure 1B) were applied to  
24 the CFM (2-4 Hz and 200 Vs<sup>-1</sup> rate of voltage change.) The CFM signals were  
25 amplified (10x), passed through a 50 Hz noise eliminator (Digitimer), filtered to  
26 500-5,000 Hz, digitised (Power1401; Cambridge Electronic Design) and recorded  
27 for offline isolation of faradaic currents corresponding to changes in [H<sup>+</sup>] and  
28 P<sub>t</sub>O<sub>2</sub>. Continuous switching between current and voltage recordings allowed  
29 near-simultaneous detection of the evoked potentials (voltage), [H<sup>+</sup>] and P<sub>t</sub>O<sub>2</sub>  
30 changes (current). Electrical forelimb stimulation was applied using a  
31 constant-current stimulator (Digitimer). Trains of stimulation (3 Hz, 1.5 mA, 300  
32 µs pulse width) were applied 3 times per animal/experimental condition with  
33 intervals of at least 3 min between the stimulations. Neuronal responses were  
34 analysed by integration of the evoked volley of extracellular potentials with the  
35 baseline noise subtracted.

1

2

3

#### 4 *Brainstem recordings*

5

6 Animals were anaesthetised and instrumented as described above ([Figure 1A](#)).  
7 In this set of experiments the dorsal surface of the brainstem was exposed for  
8 CFM recordings as previously described (Hosford et al. 2015; Hosford et al.  
9 2017). The left cervical vagus nerve was exposed, separated from the  
10 sympathetic trunk and placed on the bipolar silver wire electrodes for electrical  
11 stimulation (800  $\mu$ A, 1 ms at 3 Hz).

12

#### 13 *fMRI*

14

15 fMRI was performed using a 9.4T Agilent horizontal bore scanner (Agilent) as  
16 described in detail previously (Wells et al. 2015). Briefly, a 72 mm inner  
17 diameter volume coil was used for transmission and signal was received using a  
18 4-channel array head coil (Rapid Biomedical). To assess T2\* weighted BOLD  
19 signals the following sequence parameters were used: TR = 5s, TI = 2s,  
20 matrix size = 64  $\times$  64, FOV = 35mm  $\times$  35mm, TE = 10ms, single slice  
21 (slice thickness = 2mm), inversion pulse bandwidth = 20,000Hz (Hosford  
22 et al. 2018). BOLD responses in the S1FL region were triggered by electrical  
23 stimulation of the contralateral forelimb as described above.

24

### 25 **Results and Discussion**

26

#### 27 *Voltammetric recordings*

28

29 Using the recoding setup illustrated in [Figure 1A](#), two negatively-directed  
30 trapezoidal voltage ramps were applied to the CFM at an interval of 20 ms as  
31 illustrated in [Figure 1Bi](#): the first from 0 to -0.5 V, the second from -0.5 to -1.0  
32 V. Both voltage ramps generated a 'background' current due to the impedance  
33 of the electrode/ fluid interface ([Figure 1Bii](#)). The CFM currents generated during  
34 the ramps were digitised and the first was digitally subtracted from the second  
35 ([Figure 1Biii](#)). This produced a *differential background current*, ([Figure 1Bvi](#))

1 resulting from the *difference* between the currents on scans 1 and 2. This  
2 subtraction procedure was used to eliminate potential non-specific signals due to  
3 changes in tissue impedance, temperature, etc. These non-specific signals  
4 appear equally on both the scans and thus are removed by subtraction, allowing  
5 discrimination of changes that occur selectively on one or the other scan.  
6 Trapezoidal ramps were applied as the background current is predominantly  
7 capacitive, reducing this current to a low level during the flat part of the  
8 trapezoid where  $dV/dt$  is zero.

9  
10 Using these recording parameters the electrode was found to generate a distinct  
11 current profile in response to changes in buffer pH or  $PO_2$  (Figure 1C). Changes  
12 in  $[H^+]$  caused changes in the CFM faradaic current in the voltage range between  
13 -0.1 to -0.3 V. These changes occurred only in the first of the two voltammetric  
14 scans and, therefore, were clearly present on the differential signal.

15  
16 Oxygen is electrochemically reduced at a voltage between -0.5 and -1.0 V,  
17 generating a cathodal faradaic current. The current from oxygen reduction  
18 appears in the signal from the second (-0.5 to -1.0 V) ramp but not from the  
19 first ramp and thus could also be seen in the differential signal. Examples of the  
20 faradaic current changes in response to oxygen and pH changes in the buffer are  
21 illustrated in Figure 1C. There is a clear separation between the two peak  
22 currents allowing detection of changes in both analytes simultaneously with  
23 minimal interference between the two. Peak current changes are shown in Figure  
24 1D.

25  
26 *Proposed detection mechanism*

27  
28 The proposed origin of the recorded faradic current is the pH dependent  
29 oxidation of the hydroquinone groups on the surface of the CFM (Runnels et al.  
30 1999; Takmakov et al. 2010; Figure 1E). Our recordings support this hypothesis  
31 as distinct double-peaks of approximately the same voltage range are detected  
32 (Figure 1C). A third pH-dependent peak was reported by Takmakov and  
33 colleagues (Takmakov et al. 2010) and was ascribed to changes in electrode  
34 capacitance induced by protons disrupting the Helmholtz layer of charged water  
35 molecules surrounding the electrode tip and is, therefore, non-faradic in nature.



1 Using double-differential waveform applied during sampling we were able to  
2 remove this effect of capacitance change (as it is present on both the  
3 waveforms) after subtraction of the resulting background current.

4  
5 The reaction underlying oxygen detection is the reduction of oxygen to hydroxyl  
6 ions ([Figure 1E](#)). This reaction occurs in a series of steps involving the formation  
7 of intermediates, including hydrogen peroxide. It is non-reversible, as evident  
8 from a single unidirectional current peak on the voltammetry scan. There have  
9 been previous proposals for the mechanism of electrochemical reduction of  
10 oxygen on carbon surfaces (Taylor and Humffray 1975; Zimmerman and  
11 Wightman 1991). We propose the following mechanism ([Scheme 1](#)) which  
12 includes the formation of a hydroperoxyl intermediate as well as hydrogen  
13 peroxide.

14

#### 15 *CFM calibration*

16

17 Relative CFM sensitivities to changes in pH and PO<sub>2</sub> were determined by  
18 construction of standard calibration curves in the expected physiological ranges  
19 of changes in both variables: 7.0-7.6 units of pH and 5-75 mmHg for PO<sub>2</sub>. Peak  
20 faradaic current for pH detection was sampled at -200 mV on each of the scans.  
21 Current generated by oxygen was sampled once on each scan at 15 ms from the  
22 start of the flat phase of the trapezoid as at this time point the background  
23 current was minimal.

24

25 *In vitro* calibration demonstrated high CFM sensitivity to oxygen (1.1±0.1 nA per  
26 10 mmHg PO<sub>2</sub>; n= 10 electrodes) and protons (9.8 ± 0.8 nA per pH unit; n= 10  
27 electrodes). Responses were linear within the physiological ranges of changes in  
28 these variables (PO<sub>2</sub>, R<sup>2</sup>=0.998; pH, R<sup>2</sup>=0.981) ([Figure 2A,B](#)). Sensitivity to  
29 changes in oxygen did not change over the range of physiological pH values, nor  
30 the sensitivity to protons at different PO<sub>2</sub> levels ([Figure 2D](#)). Current responses  
31 to a 20 mmHg change in PO<sub>2</sub> were similar over a range of 7.0-7.6 units: 2.6±0.2  
32 nA at pH 7.0, 2.6±0.2 nA at pH 7.2, 2.7±0.2 nA at pH 7.4 and 2.8±0.2 nA at pH  
33 7.6. Current responses to 0.2 unit decreases in pH were similar over a 10-100  
34 mmHg range of PO<sub>2</sub>: 2.1±0.2 nA at 10 mmHg, 2.1±0.3 nA at 50 mmHg and  
35 2.2±0.3 at 100 mmHg. There was minimal interference between the two

1 measurements; PO<sub>2</sub>-sensitive current was altered by a mere 0.003±0.005nA per  
2 0.1 unit pH change, while pH-sensitive current changed by 0.1±0.03 nA per 10  
3 mmHg change in PO<sub>2</sub> (n=6, [Figure 2C and E](#)).

4  
5 These recordings show that there is no significant change in current produced by  
6 one analyte when the other varies over the physiological range expected in the  
7 brain tissue. Cross-talk between the pH and oxygen detection signals was  
8 calculated to be less than 5%, which is within the range reported for other  
9 electrochemical detection techniques (Tian et al. 2009). Further, we can  
10 confidently exclude potential contamination of the recorded signals by other  
11 oxidizable molecules as these require a positive waveform voltage, usually +1.3  
12 V (Park et al. 2011), while this technique records PO<sub>2</sub> and pH changes using a  
13 negative (reducing) waveform of 0 to -1 V.

14

#### 15 *In vivo application*

16

17 Using the recording setup illustrated by [Figure 3A](#), changes in brain P<sub>t</sub>O<sub>2</sub> were  
18 recorded during systemic hypoxia induced by a 20s-long suspension of the  
19 mechanical ventilation. This resulted in an immediate sharp decrease in oxygen-  
20 associated faradaic current by 3.2±0.6 nA, equivalent to a reduction in brain  
21 P<sub>t</sub>O<sub>2</sub> by 19±3 mmHg (n=6; [Figure 3Bi and ii](#)). Upon re-instatement of lung  
22 ventilation, the brain P<sub>t</sub>O<sub>2</sub> rapidly reversed and exceeded the baseline level by  
23 15±4 mmHg within 10 s (n=6; [Figure 3Bii](#)).

24

25 Changes in brain P<sub>t</sub>O<sub>2</sub> and pH were next recorded during systemic respiratory  
26 (hypercapnic) acidosis induced by CO<sub>2</sub> inhalation (10% CO<sub>2</sub> in the inspired gas  
27 mixture; 5 min). This stimulus caused a significant decrease in current by  
28 0.31±0.05 nA ([Figure 3Ci](#)) in the voltage range corresponding to pH changes,  
29 equivalent to a decrease in brain tissue pH by -0.11±0.02 units (n=4; [Figure](#)  
30 [3Bii](#)). Systemic hypercapnia also caused a 0.54±0.1nA increase in current (n=4;  
31 [Figure 3Bii](#)) over the voltage range corresponding to changes in PO<sub>2</sub>, equivalent  
32 to an increase in brain P<sub>t</sub>O<sub>2</sub> by 15±3 mmHg. This reflected CO<sub>2</sub>-induced increase  
33 in global brain blood flow. Upon return to normocapnia the brain P<sub>t</sub>O<sub>2</sub> decreased  
34 back to baseline within 3 min. Partial recovery of brain tissue pH was recorded  
35 during the same time period. The faradic current profiles recorded during

1 systemic hypoxia and CO<sub>2</sub>-induced acidosis were found to correspond closely to  
2 similar responses to changes in PO<sub>2</sub> and pH induced *in vitro*. Following  
3 subtraction of the control scan current from the active scan current, increases in  
4 oxygen concentration produce positive and increases in proton concentration  
5 produce negative current increments.

6

7 Electrical stimulation of the forepaw increased the neuronal activity in the S1FL  
8 of the cortex as was evident from an increase in action potential firing (recorded  
9 by the CFMs during the intervals between the applications of the voltage ramps;  
10 [Figure 3D](#)). Traces depicted in [Figure 3D](#) show the extracellular spike activity in  
11 S1FL, time-locked to the application of the stimulus.

12

13 Electrical stimulation of the forepaw was associated with a consistent increase in  
14 faradic current corresponding to an increase in P<sub>t</sub>O<sub>2</sub> (n=6; [Figure 3E](#)). Increases  
15 in P<sub>t</sub>O<sub>2</sub> were observed 1-2 seconds after the onset of the stimulation. The  
16 response was found to be biphasic with an initial increase during the period of  
17 stimulation followed by a post-stimulus decrease below the baseline ([Figure 3E](#)).  
18 Calibration of the CFM after each of the recordings revealed the peak increases  
19 in P<sub>t</sub>O<sub>2</sub> of 6.9±1.2mmHg and the post-stimulus decreases with the magnitude of  
20 3.2±2.5 mmHg (n=6; [Figure 3E](#)). Activation of somatosensory pathways  
21 concomitantly increased the faradic current recorded at the sample point for the  
22 detection of pH changes. Changes in brain tissue extracellular pH followed a  
23 similar time course, but the pH response lagged the PO<sub>2</sub> changes by ~1 s. The  
24 pH signal displayed biphasic response profile with initial alkalinisation of  
25 0.06±0.02 pH units during the period of stimulation, followed by a decrease of  
26 0.03±0.01 below baseline after the termination of the stimulus (n=6; [Figure](#)  
27 [3E](#)).

28

29 There is evidence that the mechanisms of neurovascular coupling might be  
30 different in different brain areas (Devonshire et al. 2012). We next placed the  
31 CFM within the nucleus of the solitary tract (NTS) of the brainstem, and recorded  
32 changes in P<sub>t</sub>O<sub>2</sub> and pH evoked by activation of *visceral* sensory pathways. The  
33 NTS receives mono-synaptic afferent inputs via the vagus nerve (Berthoud and  
34 Neuhuber 2000). Electrical stimulation of the vagus nerve produced biphasic  
35 changes in both P<sub>t</sub>O<sub>2</sub> and pH in the NTS that were markedly different from those

1 recorded in the somatosensory cortex. There was an initial decrease in  $P_tO_2$  by  
2  $4.5 \pm 2.2$  mmHg and extracellular acidification by  $0.095 \pm 0.04$  pH units, followed  
3 by a post-stimulus overshoot in  $P_tO_2$  by  $2.3 \pm 0.9$  mmHg ( $n=6$ ; [Figure 3F](#)) with  
4 pH slowly recovering towards the baseline.

5 The  $P_tO_2$  and pH recordings performed within the NTS show that this technique is  
6 applicable to studies of small discrete nuclei and/or regions located deep in the  
7 brain that are difficult to access using the existing imaging techniques. This  
8 could be especially useful when investigating the heterogeneity of the  
9 neurovascular coupling responses in the brain, as highlighted by dramatically  
10 different  $P_tO_2$  and pH response profiles recorded in the NTS ([Figure 3F](#)) and the  
11 somatosensory cortex ([Figure 3E](#)).

12

### 13 *Comparison with fMRI*

14

15 BOLD signals induced in the S1FL by activation of somatosensory pathways were  
16 recorded in identical experimental conditions to allow comparison between the  
17 responses recorded using fMRI and  $P_tO_2$  changes recorded using voltammetry.  
18 Electrical forepaw stimulation induced biphasic BOLD signal changes in the S1FL  
19 ([Figure 4A and B](#)). In order to compare the BOLD signal changes with measured  
20 changes in  $P_tO_2$ , the calibrated voltammetry signal was down-sampled to 0.5Hz  
21 and both signals were standardised with a z-score function and overlaid ([Figure](#)  
22 [4C](#)). Plotting the distance between each sample point for the two techniques  
23 revealed much of the difference observed during the post-stimulus undershoot,  
24 where it was maximal 6 s after the termination of the stimulus.

25

26 The data obtained show that the profile of brain  $P_tO_2$  changes recorded using  
27 this voltammetric technique is virtually identical to the profile of BOLD responses  
28 recorded using fMRI, with additional advantage of simultaneous detection of  
29 brain tissue pH and monitoring of the evoked neuronal activity.

30

### 31 *Conclusion*

32

33 Here we describe a novel experimental technique for simultaneous detection of  
34 brain  $P_tO_2$ , pH and extracellular field potentials using CFM voltammetry.  
35 Electrochemical detection of  $P_tO_2$  and pH changes with near-simultaneous

1 recordings of neuronal activity is possible in small nuclei located deep in the  
2 brain. Simultaneous monitoring of blood flow ( $P_tO_2$ ), metabolism (pH) and  
3 neuronal activity using the CFM-based technique described here may prove to be  
4 useful in studies of the metabolic mechanisms underlying the neurovascular  
5 coupling response.

6

7

8

## 9 **Acknowledgements**

10

11 The author(s) disclose receipt of the following financial support for the research,  
12 authorship, and/or publication of this article:

13

14 This work was supported by The Wellcome Trust and British Heart Foundation

15

16 JAW is a Wellcome Trust/Royal Society Sir Henry Dale Fellow

17

18 AVG is a Wellcome Trust Senior Research Fellow (Refs: 095064 and 200893).

19

20 The author(s) declare no potential conflicts of interest with respect to the  
21 research, authorship, and/or publication of this article.

22

## 23 **References**

24

- 25 Angelova, P.R., Kasymov, V., Christie, I., Sheikhabaiei, S., Turovsky, E.,  
26 Marina, N., Korsak, A., Zwicker, J., Teschemacher, A.G., Ackland, G.L., Funk,  
27 G.D., Kasparov, S., Abramov, A.Y., Gourine, A.V., 2015. Functional Oxygen  
28 Sensitivity of Astrocytes. *J Neurosci* 35(29), 10460-10473.
- 29 Attwell, D., Buchan, A.M., Charpak, S., Lauritzen, M., Macvicar, B.A., Newman,  
30 E.A., 2010. Glial and neuronal control of brain blood flow. *Nature* 468(7321),  
31 232-243.
- 32 Berthoud, H.R., Neuhuber, W.L., 2000. Functional and chemical anatomy of the  
33 afferent vagal system. *Auton Neurosci* 85(1-3), 1-17.
- 34 Bootman, M.D., Allman, S., Rietdorf, K., Bultynck, G., 2018. Deleterious effects  
35 of calcium indicators within cells; an inconvenient truth. *Cell Calcium* 73, 82-87.
- 36 Bucher, E.S., Fox, M.E., Kim, L., Kirkpatrick, D.C., Rodeberg, N.T., Belle, A.M.,  
37 Wightman, R.M., 2014. Medullary norepinephrine neurons modulate local oxygen  
38 concentrations in the bed nucleus of the stria terminalis. *J Cereb Blood Flow*  
39 *Metab* 34(7), 1128-1137.

- 1 Buxton, R.B., Frank, L.R., 1997. A model for the coupling between cerebral  
2 blood flow and oxygen metabolism during neural stimulation. *J Cereb Blood Flow*  
3 *Metab* 17(1), 64-72.
- 4 Devonshire, I.M., Papadakis, N.G., Port, M., Berwick, J., Kennerley, A.J.,  
5 Mayhew, J.E., Overton, P.G., 2012. Neurovascular coupling is brain region-  
6 dependent. *Neuroimage* 59(3), 1997-2006.
- 7 Gourine, A.V., Kasymov, V., Marina, N., Tang, F., Figueiredo, M.F., Lane, S.,  
8 Teschemacher, A.G., Spyer, K.M., Deisseroth, K., Kasparov, S., 2010. Astrocytes  
9 control breathing through pH-dependent release of ATP. *Science* 329(5991),  
10 571-575.
- 11 Helmchen, F., Denk, W., 2005. Deep tissue two-photon microscopy. *Nat*  
12 *Methods* 2(12), 932-940.
- 13 Hosford, P.S., Gourine, A.V., 2018. What is the key mediator of the  
14 neurovascular coupling response? *Neurosci Biobehav Rev* 96, 174-181.
- 15 Hosford, P.S., Millar, J., Ramage, A.G., 2015. Cardiovascular afferents cause the  
16 release of 5-HT in the nucleus tractus solitarius; this release is regulated by the  
17 low- (PMAT) not the high-affinity transporter (SERT). *J Physiol* 593(7), 1715-  
18 1729.
- 19 Hosford, P.S., Millar, J., Ramage, A.G., Marina, N., 2017. Abnormal oxygen  
20 homeostasis in the nucleus tractus solitarius of the spontaneously hypertensive  
21 rat. *Exp Physiol* 102(4), 389-396.
- 22 Hosford, P.S., Mosienko, V., Kishi, K., Jurisic, G., Seuwen, K., Kinzel, B., Ludwig,  
23 M.G., Wells, J.A., Christie, I.N., Koolen, L., Abdala, A.P., Liu, B.H., Gourine, A.V.,  
24 Teschemacher, A.G., Kasparov, S., 2018. CNS distribution, signalling properties  
25 and central effects of G-protein coupled receptor 4. *Neuropharmacology* 138,  
26 381-392.
- 27 Howarth, C., Sutherland, B., Choi, H.B., Martin, C., Lind, B.L., Khennouf, L.,  
28 LeDue, J.M., Pakan, J.M., Ko, R.W., Ellis-Davies, G., Lauritzen, M., Sibson, N.R.,  
29 Buchan, A.M., MacVicar, B.A., 2017. A Critical Role for Astrocytes in Hypercapnic  
30 Vasodilation in Brain. *J Neurosci* 37(9), 2403-2414.
- 31 Iadecola, C., 2017. The Neurovascular Unit Coming of Age: A Journey through  
32 Neurovascular Coupling in Health and Disease. *Neuron* 96(1), 17-42.
- 33 Karagiannis, A., Sylantsev, S., Hadjihambi, A., Hosford, P.S., Kasparov, S.,  
34 Gourine, A.V., 2016. Hemichannel-mediated release of lactate. *J Cereb Blood*  
35 *Flow Metab* 36(7), 1202-1211.
- 36 Logothetis, N.K., Pauls, J., Augath, M., Trinath, T., Oeltermann, A., 2001.  
37 Neurophysiological investigation of the basis of the fMRI signal. *Nature*  
38 412(6843), 150-157.
- 39 Millar, J., Pelling, C.W., 2001. Improved methods for construction of carbon fibre  
40 electrodes for extracellular spike recording. *J Neurosci Methods* 110(1-2), 1-8.
- 41 Mishra, A., Reynolds, J.P., Chen, Y., Gourine, A.V., Rusakov, D.A., Attwell, D.,  
42 2016. Astrocytes mediate neurovascular signaling to capillary pericytes but not  
43 to arterioles. *Nat Neurosci* 19(12), 1619-1627.
- 44 Park, J., Takmakov, P., Wightman, R.M., 2011. In vivo comparison of  
45 norepinephrine and dopamine release in rat brain by simultaneous  
46 measurements with fast-scan cyclic voltammetry. *J Neurochem* 119(5), 932-  
47 944.
- 48 Rodeberg, N.T., Sandberg, S.G., Johnson, J.A., Phillips, P.E., Wightman, R.M.,  
49 2017. Hitchhiker's Guide to Voltammetry: Acute and Chronic Electrodes for in  
50 Vivo Fast-Scan Cyclic Voltammetry. *ACS Chem Neurosci* 8(2), 221-234.
- 51 Roy, C.S., Sherrington, C.S., 1890. On the Regulation of the Blood-supply of the  
52 Brain. *J Physiol* 11(1-2), 85-158 117.

- 1 Runnels, P.L., Joseph, J.D., Logman, M.J., Wightman, R.M., 1999. Effect of pH  
2 and surface functionalities on the cyclic voltammetric responses of carbon-fiber  
3 microelectrodes. *Anal Chem* 71(14), 2782-2789.
- 4 Takano, T., Tian, G.F., Peng, W., Lou, N., Libionka, W., Han, X., Nedergaard, M.,  
5 2006. Astrocyte-mediated control of cerebral blood flow. *Nat Neurosci* 9(2), 260-  
6 267.
- 7 Takmakov, P., Zacek, M.K., Keithley, R.B., Bucher, E.S., McCarty, G.S.,  
8 Wightman, R.M., 2010. Characterization of local pH changes in brain using fast-  
9 scan cyclic voltammetry with carbon microelectrodes. *Anal Chem* 82(23), 9892-  
10 9900.
- 11 Taylor, R.J., Humffray, A.A., 1975. Electrochemical studies on glassy carbon  
12 electrodes: II. Oxygen reduction in solutions of high pH (pH>10). *Journal of*  
13 *Electroanalytical Chemistry and Interfacial Electrochemistry* 64(1), 63-84.
- 14 Tian, F., Gourine, A.V., Huckstepp, R.T., Dale, N., 2009. A microelectrode  
15 biosensor for real time monitoring of L-glutamate release. *Anal Chim Acta*  
16 645(1-2), 86-91.
- 17 Wells, J.A., Christie, I.N., Hosford, P.S., Huckstepp, R.T., Angelova, P.R., Vihko,  
18 P., Cork, S.C., Abramov, A.Y., Teschemacher, A.G., Kasparov, S., Lythgoe, M.F.,  
19 Gourine, A.V., 2015. A critical role for purinergic signalling in the mechanisms  
20 underlying generation of BOLD fMRI responses. *J Neurosci* 35(13), 5284-5292.
- 21 Zimmerman, J.B., Wightman, R.M., 1991. Simultaneous electrochemical  
22 measurements of oxygen and dopamine in vivo. *Anal Chem* 63(1), 24-28.

23

24

## 25 **Figure Legends**

26

27 **Figure 1:** Electrochemical detection of PO<sub>2</sub> and pH changes using carbon fiber  
28 microelectrodes (CFM). **A.** Schematic diagram of the required equipment for  
29 simultaneous electrochemical and electrophysiological recordings using CFM.  
30 *Left:* construction of carbon-in-glass CFM. *Right:* a block diagram of  
31 electrochemical signal generation and acquisition. A voltage driver combined  
32 with current amplifier is used for the electrochemical signal generation and  
33 detection. A voltage amplifier is used to record neuronal activity between  
34 applications of electrochemical waveform. Recorded signal is filtered by a  
35 standard band pass filter. All signals are digitised online and recorded for offline  
36 analysis. **B.** Electrochemical signal generation and processing: i) two inverted  
37 trapezoidal drive voltage waveforms applied to the electrode; the first from 0 to  
38 -0.5 V and the second from -0.5 to -1 V. ii) Background current profile  
39 generated by the voltage waveform resulting from the capacitive nature of the  
40 electrode. iii) Shows the background current resulting from the two applied  
41 voltage waveforms combined by superimposition; the resulting combined  
42 background current is stored digitally and vi) subtracted from the subsequently

1 acquired scans to provide the measure of the current generated by changes in  
2 analyte concentration at the surface of the electrode. **C.** False color plots  
3 illustrating current changes over the voltage range of the electrochemical  
4 waveform cycling from 0 to -1 V recorded in phosphate-buffered saline. *Left*  
5 shows the current changes induced by a reduction in buffer pH from 7.4 to 6.8  
6 units. *Right* shows the current changes induced by an increase in buffer PO<sub>2</sub> from  
7 0 to 50 mmHg. Sample points when the peak current changes were measured  
8 are indicated for pH and PO<sub>2</sub>. **D.** Representative recordings of CFM  
9 electrochemical current changes in response to given changes in pH and PO<sub>2</sub>. **E.**  
10 Proposed detection schemes for protons (*left*) and oxygen (*right*) during the  
11 voltammetric scan on the surface of the CFM. Protonation of quinone groups on  
12 the surface of the CFM produces the current associated with the pH changes.  
13 Oxygen is reduced via intermediate steps to hydroxide. The flux of electrons  
14 from the CFM to molecular oxygen produces the current associated with changes  
15 in PO<sub>2</sub>.

16

17 **Figure 2:** Validation of the technique and calibration of CFMs. **A.** Calibration  
18 curve illustrating changes in CFM electrochemical current recorded at the pH  
19 sample point in response to changes in buffer pH from 7.4 to 7.0, 7.2 and 7.6.  
20 Calibration points represent the means ( $\pm$ S.E.M) peak current changes of 10  
21 electrodes exposed to a given change in buffer pH starting from 7.4. **B.**  
22 Calibration curve illustrating changes in CFM electrochemical current recorded at  
23 the oxygen sample point in response to changes in buffer PO<sub>2</sub> between 5-75  
24 mmHg. Calibration points represent the means ( $\pm$ S.E.M) peak current changes  
25 of 10 electrodes, each exposed to every PO<sub>2</sub> increment once. Standard linear  
26 regression was applied to fit a line for both calibrations; the equation and R<sup>2</sup> are  
27 indicated. **C.** Representative traces showing changes in peak current at the PO<sub>2</sub>  
28 and pH sample points during a decrease in buffer pH of 0.2 units or increase in  
29 buffer PO<sub>2</sub> by 50 mmHg. **D.** *Left:* summary data showing peak currents  
30 generated in response to a 20 mmHg increase in PO<sub>2</sub> over a physiological range  
31 of changes in buffer pH at 7.0, 7.2, 7.4 or 7.6 units. Each point represents the  
32 mean ( $\pm$ S.E.M) peak response of 12 electrodes. *Right:* summary data showing  
33 peak currents generated in response to a 0.2 unit decrease in pH over a  
34 physiological range of changes in PO<sub>2</sub> at: 10, 50 and 100 mmHg. Each point  
35 represents the mean ( $\pm$ S.E.M) peak response of 9 electrodes. **E.** Summary data



1 of peak current changes recorded at the pH and PO<sub>2</sub> sample points in response  
2 to a decrease in pH by 0.2 units (*left*) and at the pH and PO<sub>2</sub> sample points in  
3 response to an increase in PO<sub>2</sub> by 50 mmHg (*right*). Shown are the means  
4 ( $\pm$ S.E.M) peak current responses of 6 electrodes.

5

6 **Figure 3:** Simultaneous detection of brain tissue PO<sub>2</sub>, pH, and extracellular field  
7 potentials. **A.** Schematic illustration of the *in vivo* recording setup in an  
8 anaesthetised rat showing placement of the CFM in the somatosensory cortex  
9 with Ag/AgCl reference electrode in the contralateral hemisphere. The forepaw  
10 was stimulated electrically to recruit somatosensory pathways. Separate  
11 placement of the CFM in the nucleus of the solitary tract (NTS) and the vagus  
12 nerve stimulator are also shown. **B.** The effect of apnoea on oxygen-sensitive  
13 current recorded in the somatosensory cortex. i) False color plot showing  
14 changes in oxygen-sensitive current over the range of the voltammetric scan  
15 during a 20 s apnoeic episode. The sample point from which the oxygen-  
16 sensitive current was recorded is indicated. ii) Brain P<sub>t</sub>O<sub>2</sub> changes recorded using  
17 CFM during systemic hypoxia (means $\pm$ S.E.M; n=6) **C.** The effect of respiratory  
18 acidosis induced by inhalation of 10% CO<sub>2</sub> in the inspired gas mixture on oxygen  
19 and proton-sensitive currents recorded in the somatosensory cortex. i) False  
20 color plot showing changes in oxygen and proton-sensitive currents over the  
21 range of the voltammetric scan during systemic hypercapnia. The sample points  
22 from which the oxygen and proton-sensitive currents were recorded are  
23 indicated. ii) Brain tissue PO<sub>2</sub> and pH changes recorded using CFM during  
24 systemic hypercapnia (means $\pm$ S.E.M; n=4) **D.** Representative recording of  
25 extracellular field potentials in the somatosensory cortex evoked by electrical  
26 forelimb stimulation during simultaneous brain P<sub>t</sub>O<sub>2</sub> and pH sampling. *Inset*  
27 illustrates the intervals between pH/PO<sub>2</sub> sampling available for extracellular  
28 potential recording. **E.** Changes in brain P<sub>t</sub>O<sub>2</sub> and pH recorded in the  
29 somatosensory cortex in response to electrical forelimb stimulation (3 Hz, 20 s;  
30 means  $\pm$ S.E.M; n=6). **F.** Changes in P<sub>t</sub>O<sub>2</sub> and pH recorded in the nucleus of the  
31 solitary tract of the brainstem in response to electrical stimulation of the vagus  
32 nerve (3 Hz, 20 s; means  $\pm$ S.E.M; n=6).

33

34 **Figure 4:** Comparison of brain P<sub>t</sub>O<sub>2</sub> changes profile recorded using CFM  
35 voltammetry and that of BOLD responses recorded using fMRI. **A.** BOLD

1 response profile illustrating changes in mean signal intensity in the  
2 somatosensory cortex (S1FL) induced by the electrical stimulation of the  
3 contralateral forelimb in anesthetised rats (means  $\pm$  S.E.M; n=6). **B.**  
4 Representative BOLD activation map (familywise error,  $p < 0.05$ ,  $n_v = 3$ )  
5 taken at one coronal slice (distance from Bregma is indicated) level showing  
6 activation of the somatosensory cortex in an anesthetised rat. Color bar  
7 represents the t-score from statistical parametric mapping mixed-effects  
8 analysis,  $p < 0.05$  (uncorrected). **C.** Comparison of time course and response  
9 profile of standardised  $P_tO_2$  and BOLD responses in the S1FL of the anesthetised  
10 rat evoked by forelimb stimulation. Responses are represented as a mean z-score  
11 from the recordings obtained in 6 animals for each experimental measurement.  
12 The standard difference is the difference calculated between the two z-scores at  
13 each sample point.  $P_tO_2$  recordings were down sampled by averaging 8 sampled  
14 data points to achieve the sampling frequency of 0.5 Hz, equal to that of the  
15 fMRI sampling rate.

16

17 **Scheme 1:** Proposed intermediate and overall reaction scheme underlying the  
18 reduction of molecular oxygen on the carbon surface.

19

20

21

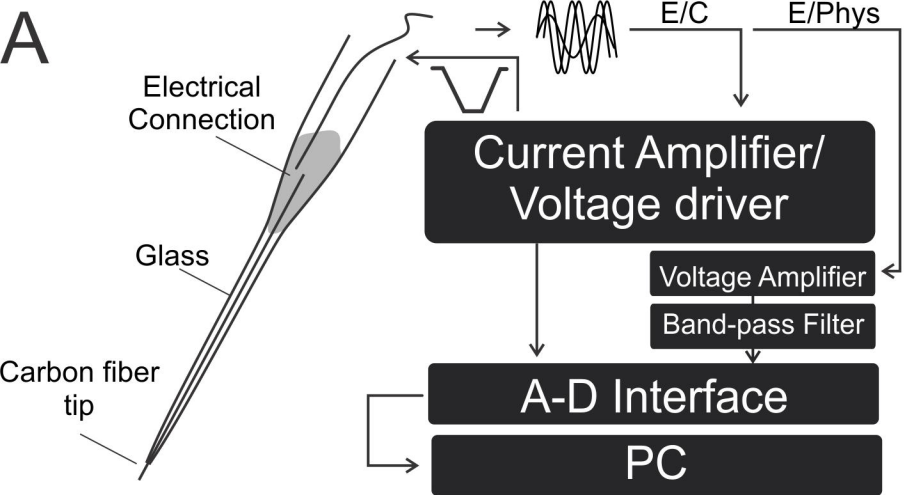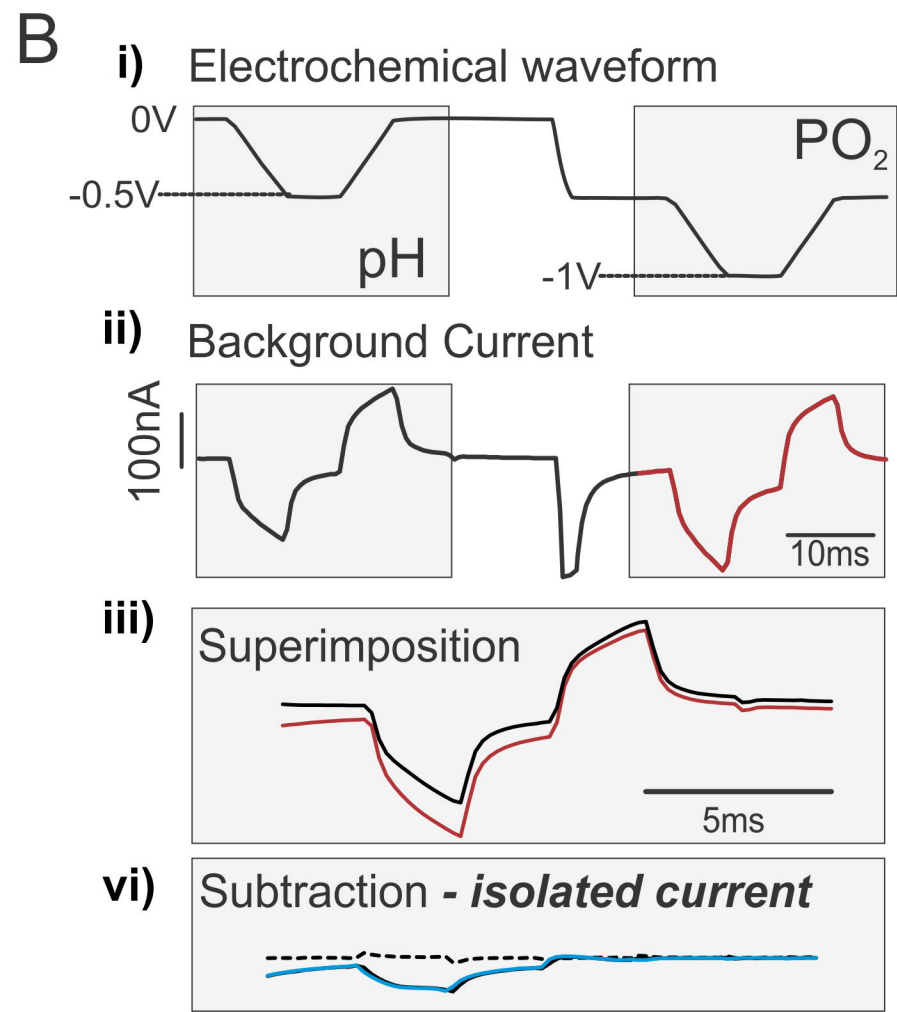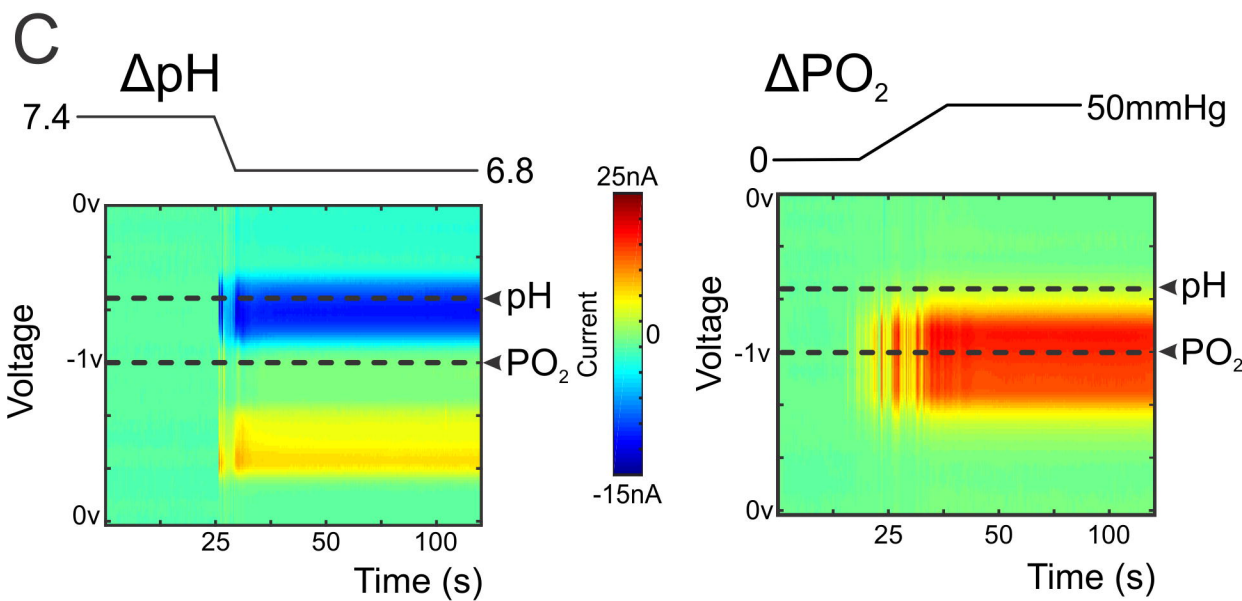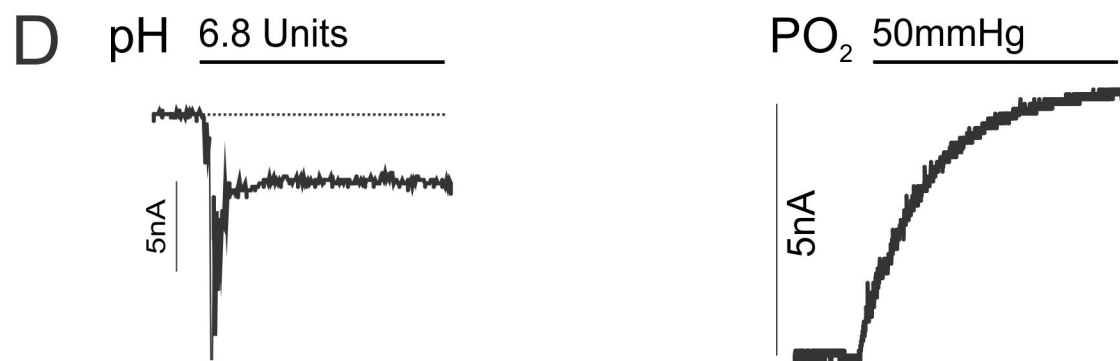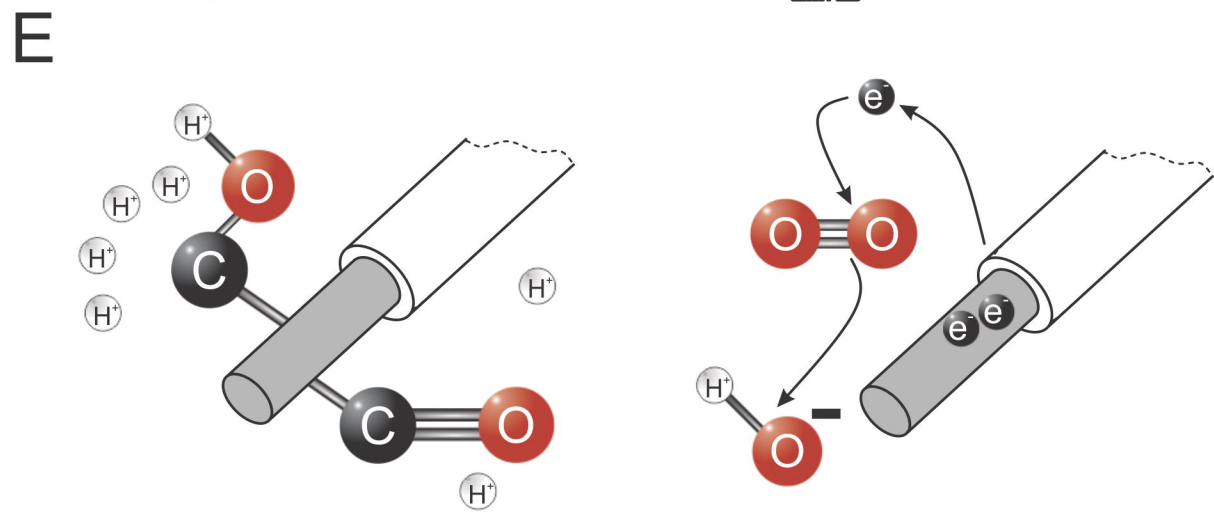

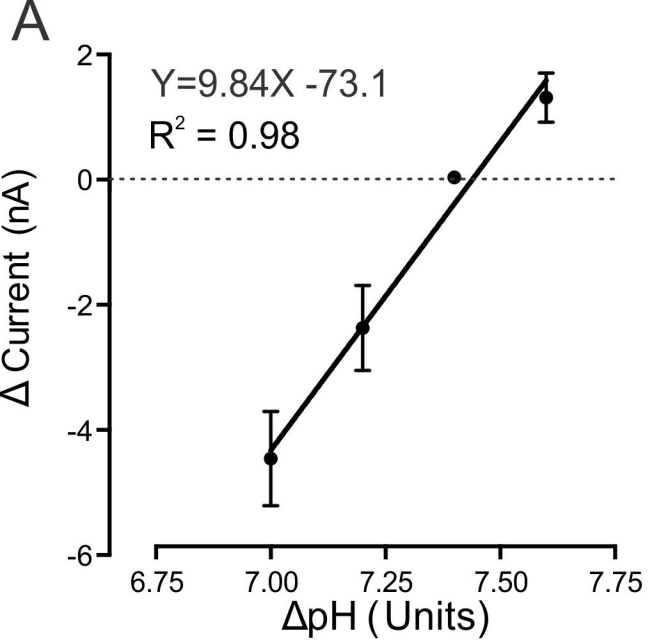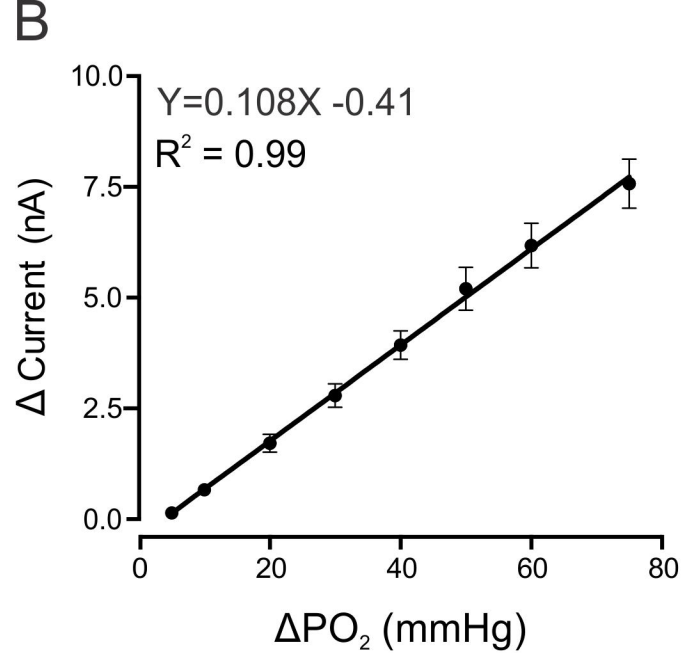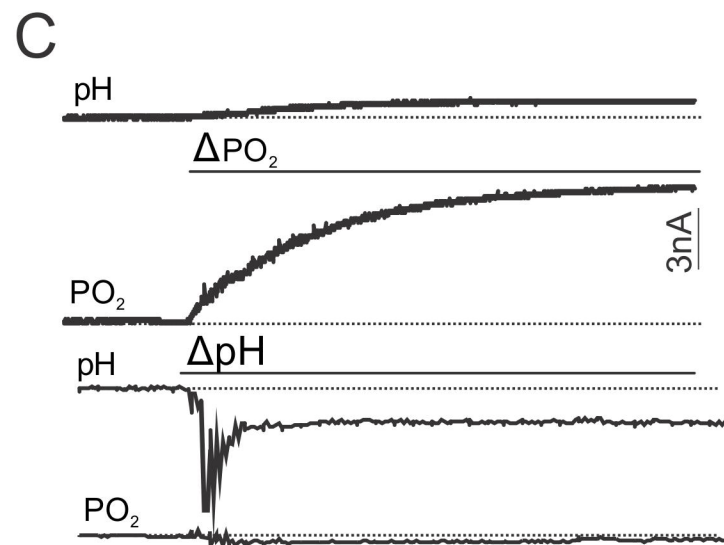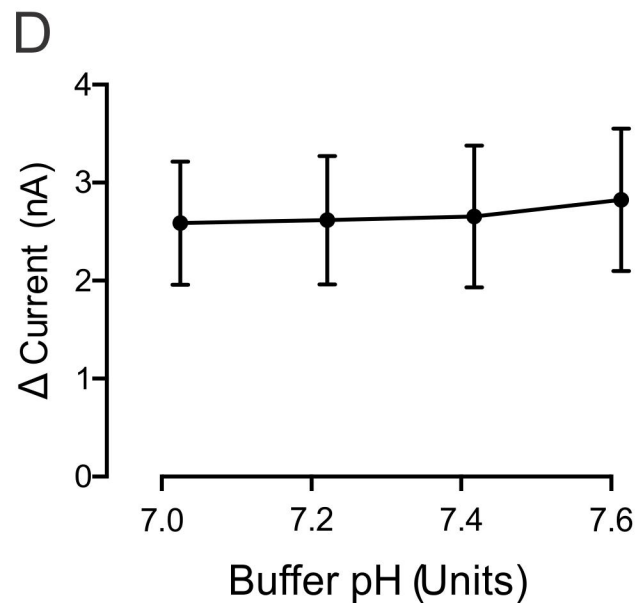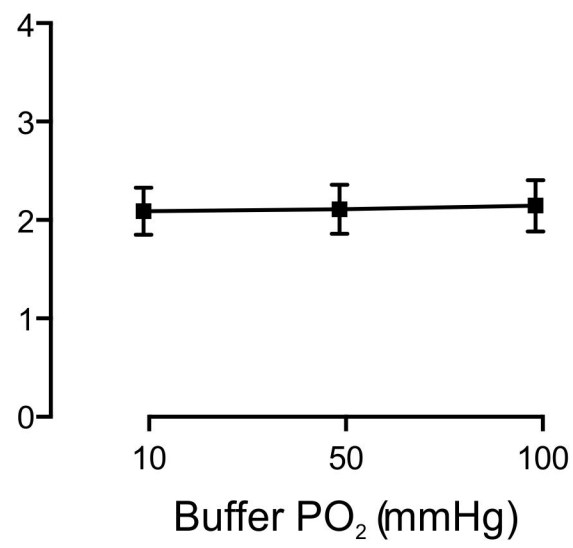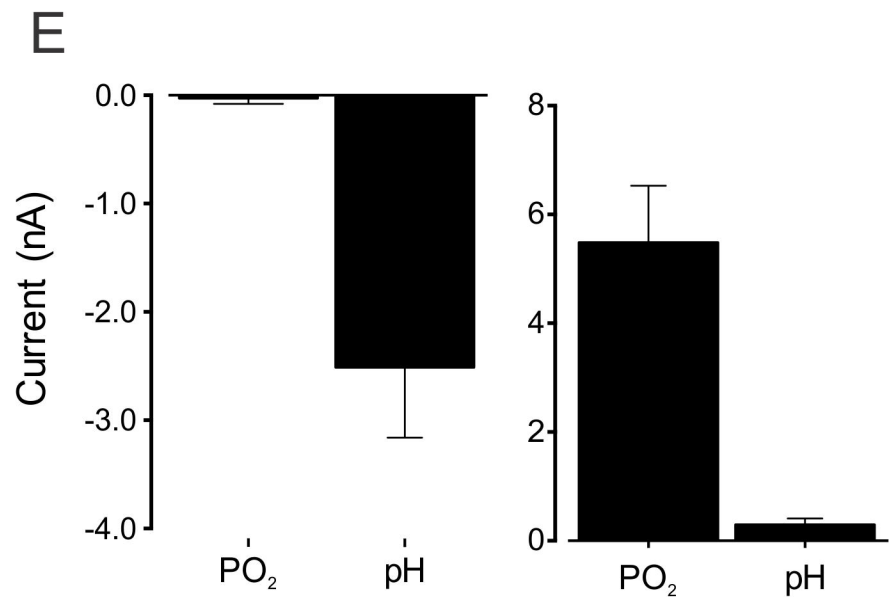

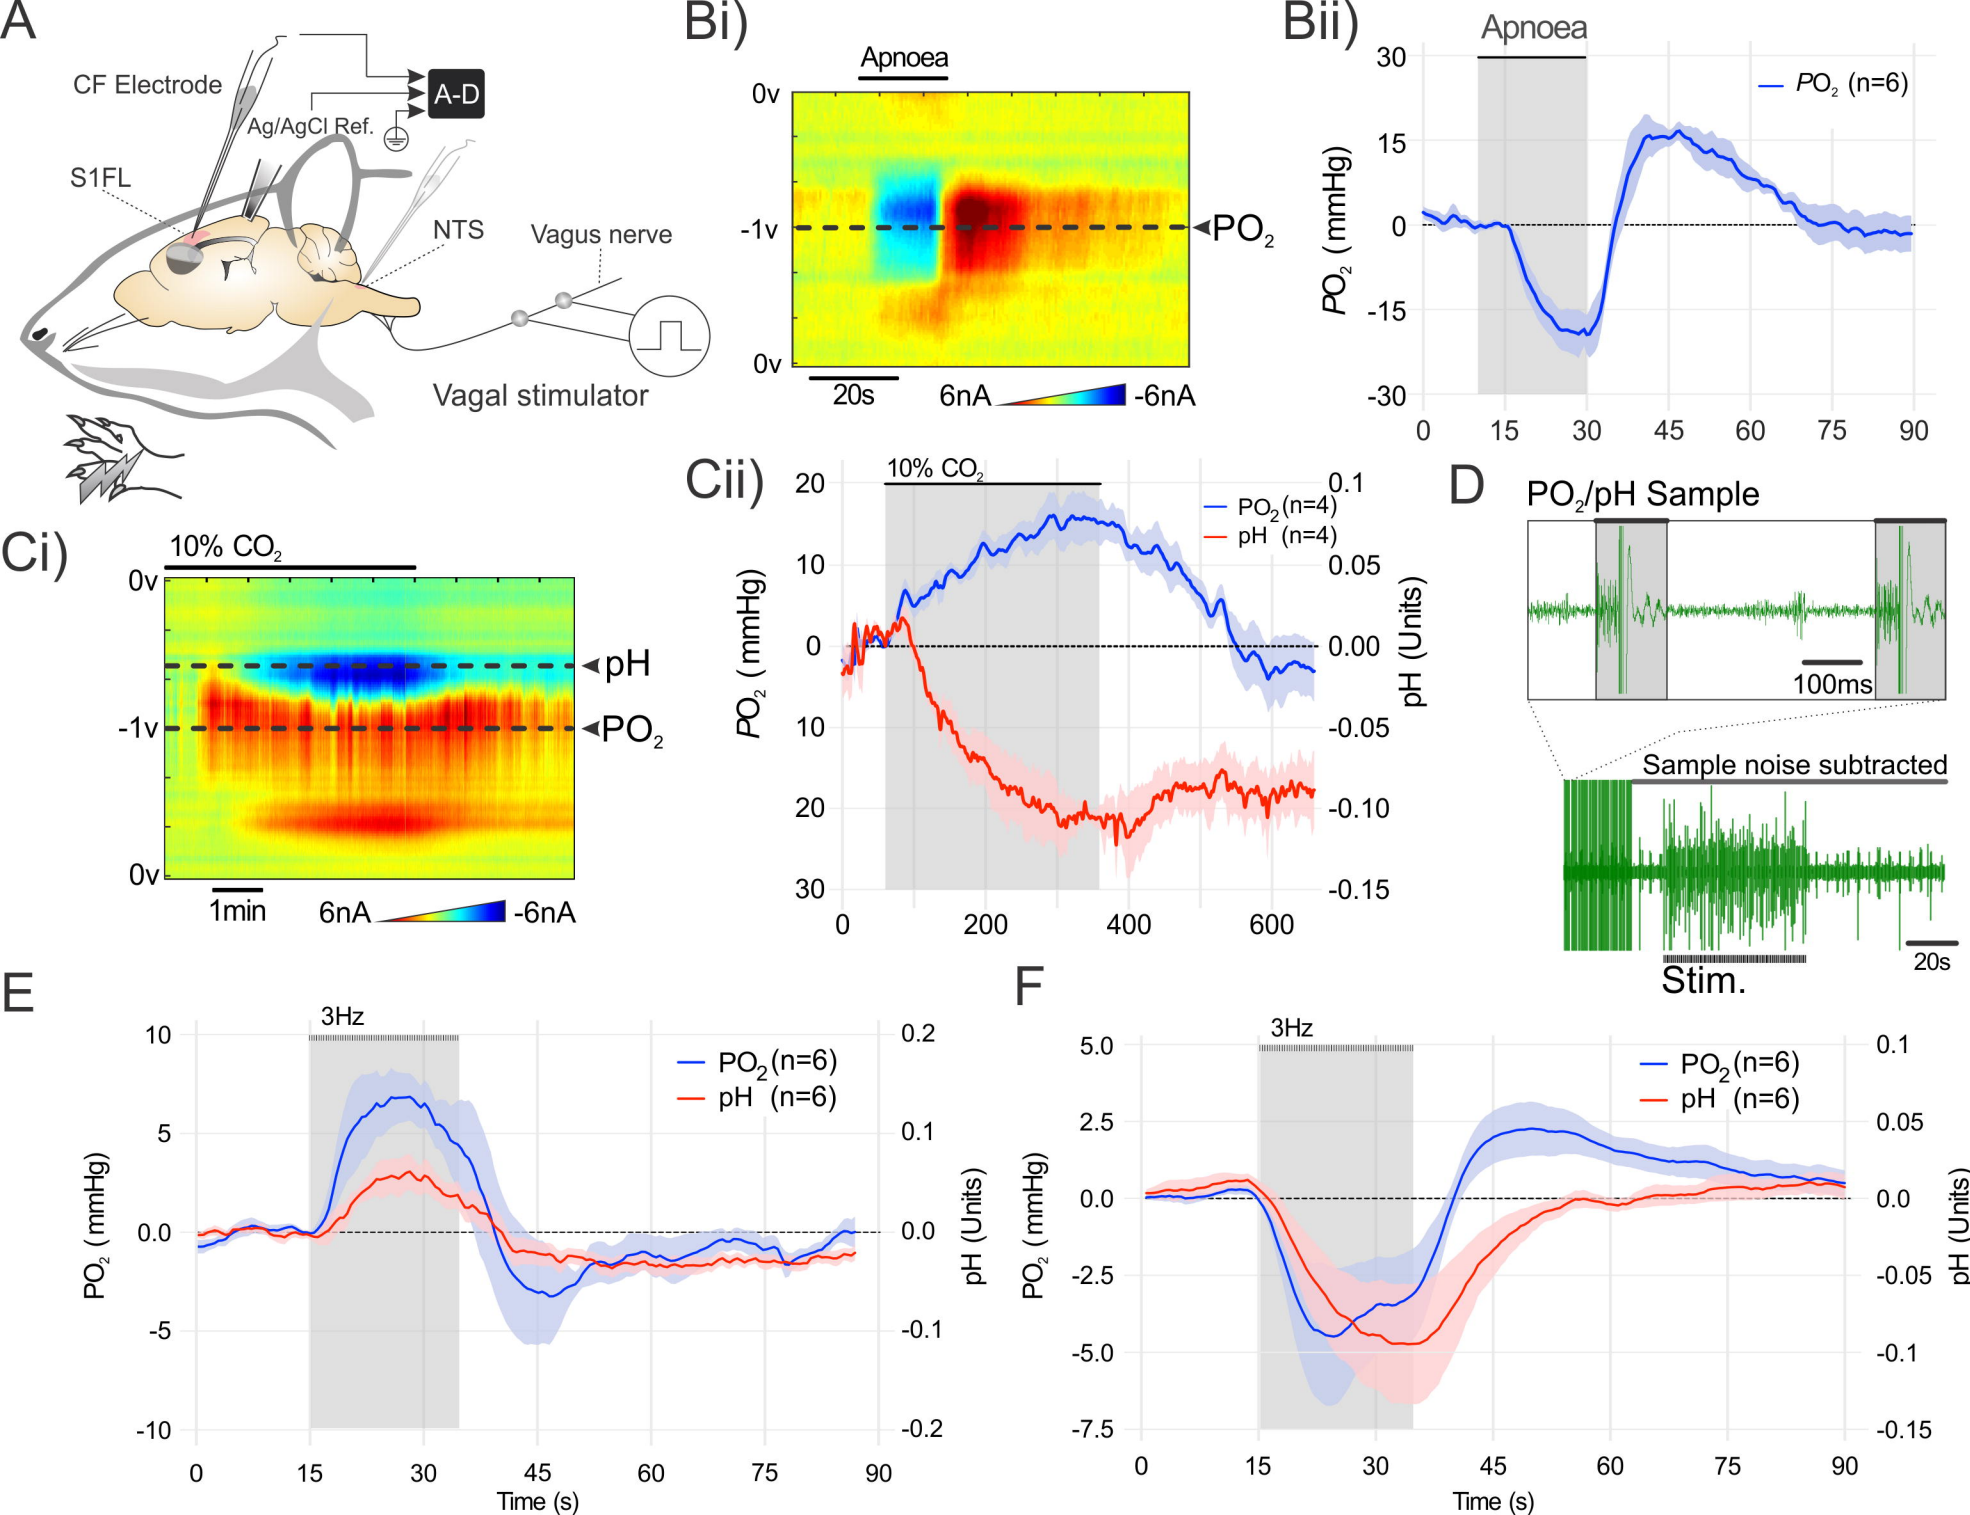

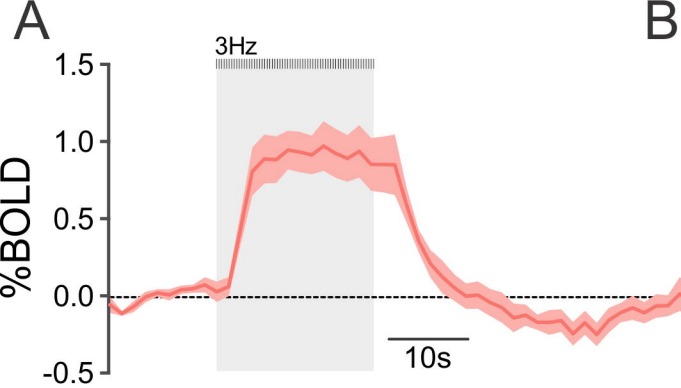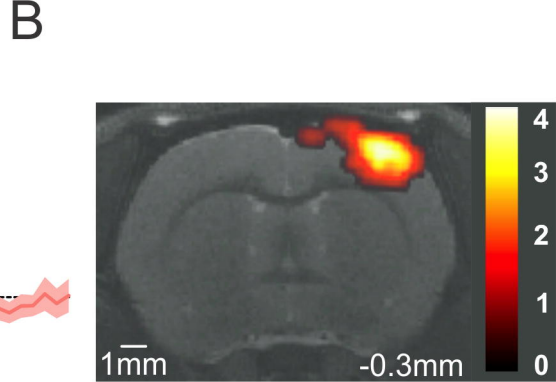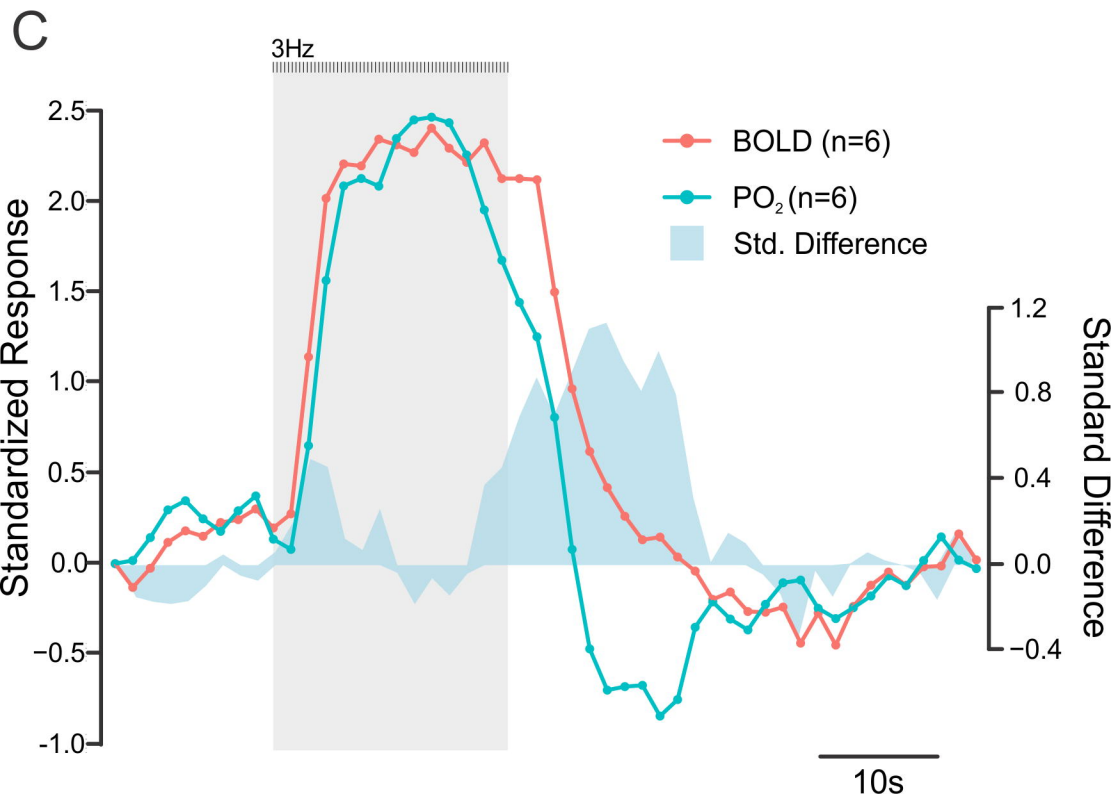

# Scheme 1

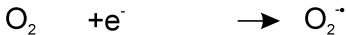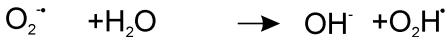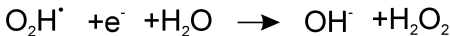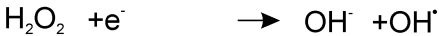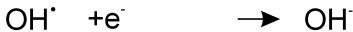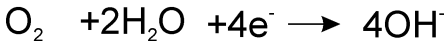

overall reaction
